# Supplementary material
Source: PubMed Central journal article supplement (PMC7674066)
Supplement: AAC.01376-20-s0001.pdf [file AAC.01376-20-s0001.pdf]

1 **Supplementary Materials**

2 1. Determination of Linezolid Pharmacokinetic Profile in Plasma and ELF for Mice  
3 and NHP's

4 2. Murine Pharmacokinetic Profile of Linezolid  
5 Table S1: Pharmacokinetic parameter values for linezolid administered orally to  
6 mice as a single dose; Table S2: Fit of the model to the data for the plasma and  
7 ELF linezolid profile in mice

8 3. Non-Human Primate Pharmacokinetic Profile of Linezolid  
9 Table S3: Pharmacokinetic parameter values for linezolid administered orally to  
10 cynomolgus macaque as a single dose; Table S4: Fit of the model to the data for  
11 the plasma and ELF linezolid profile in cynomolgus macaques

12 4. Model fit to drug concentrations, total bacterial burden and less-susceptible  
13 bacterial burden simultaneously for murine, NHP and human PK profiles, as  
14 simulated in the HFIM  
15 Table S5: Model fit of linezolid concentration-time profiles, total MTB population  
16 and less-susceptible linezolid MTB population in simulated murine (Panel A),  
17 cynomolgus macaque (Panel B) and human (Panel C) profiles in the HFIM; Table  
18 S6: Calculated  $AUC_{24h}$  (mg\*h/L),  $C_{min}$  (mg/L), and day 28 (hour 672) Mtb killing  
19 for HFIM arms in which mouse, NHP, and human PK profiles for linezolid 600  
20 and 900 mg/day were simulated for plasma and ELF.

21 5. Desired versus achieved Area Under the concentration-time Curve (AUC) for the  
22 prospective validation experiment for resistance suppression in the HFIM  
23 Table S7: Desired versus achieved linezolid Area Under the concentration-time  
24 Curve (AUC mg\*hr/L) for the prospective validation experiment

25

26 *Determination of Linezolid Pharmacokinetic Profile in Plasma and ELF for Mice and*  
27 *NHP's:*

28 Single doses of linezolid were administered to both mice and NHP's by gavage (mice)  
29 or via a naso-gastric tube (NHP's). Mice were sacrificed by cohort (n = 3), at 8 different  
30 time points. At sacrifice, plasma and BronchoAlveolar Lavage (BAL) fluid were collected  
31 and assayed by LC/MS/MS for linezolid and urea. Urea dilution was employed to  
32 calculate Epithelial Lining Fluid (ELF) concentrations of linezolid. For NHP's, there were  
33 5 plasma samples obtained over 24 hours from 8 Cynomolgus macaques. At 4 different  
34 time points, two animals underwent BAL. As with mice, all samples were assayed for  
35 both linezolid and urea, to allow calculation of ELF concentrations of linezolid.

36 For mice, all data (plasma and ELF concentrations) were analyzed  
37 simultaneously by a population pharmacokinetic modeling approach employing the  
38 program BigNPAG. The model system has been previously described (1). The  
39 weighting was as the inverse of the estimated observation variance. As the data were  
40 generated via a single point destructive model, the adaptive "γ" feature of BigNPAG was  
41 not employed.

42 For NHP's, all data were analyzed as above, but since this was not a single point  
43 destructive model, the adaptive γ feature was employed to optimize the Fisher  
44 Information.

45 Pre-Bayesian (population) regression and Bayesian (individual) regression were  
46 performed for both outputs (plasma and ELF linezolid concentrations). Mean Weighted  
47 Error (MWE) and Bias-adjusted Mean Weighted Squared Error (BAMWSE) served as  
48 measures of Bias and Precision, respectively.

49 All animal care was in accordance with institutional guidelines.

50

51 *Murine Pharmacokinetic Profile of Linezolid:*

52 The Mean, Median and Standard Deviation of the pharmacokinetic parameter  
53 values for mice are displayed below in Table S1.

54

55 **Table S1:** Pharmacokinetic parameter values for linezolid administered orally to mice as  
56 a single dose.

|        | V <sub>c</sub> | CL      | K <sub>23</sub> | K <sub>32</sub> | V <sub>ELF</sub> | K <sub>a</sub>  |
|--------|----------------|---------|-----------------|-----------------|------------------|-----------------|
| Units  | L/kg           | L/hr/kg | h <sup>-1</sup> | h <sup>-1</sup> | L/kg             | h <sup>-1</sup> |
| Mean   | 1.12           | 0.520   | 10.7            | 9.90            | 0.992            | 12.8            |
| Median | 1.01           | 0.490   | 7.56            | 9.81            | 0.864            | 13.5            |

|                    |       |       |      |       |       |      |
|--------------------|-------|-------|------|-------|-------|------|
| Standard Deviation | 0.772 | 0.124 | 4.18 | 0.777 | 0.369 | 2.89 |
|--------------------|-------|-------|------|-------|-------|------|

57  $V_c$ =Volume of the Central Compartment; CL=clearance;  $K_{23}$  and  $K_{32}$ = first order  
58 intercompartmental transfer rate constants;  $K_a$ =first order absorption rate constant

59 In Table S2 below, the fit of the model to the data is displayed for the mice.

60

61

62 **Table S2:** Fit of the model to the data for the plasma and ELF linezolid profile in mice

| Output | Pre-Bayesian/ Bayesian | Regression                     | MWE    | BAMWSE |
|--------|------------------------|--------------------------------|--------|--------|
| Plasma | Pre-Bayesian           | $Y=1.07*X-2.10$ ; $r^2=0.821$  | 0.574  | 4.95   |
| ELF    | Pre-Bayesian           | $Y=1.25*X-3.02$ ; $r^2=0.843$  | -0.150 | 2.68   |
| Plasma | Bayesian               | $Y=1.04*X-0.905$ ; $r^2=0.979$ | 0.0192 | 0.287  |
| ELF    | Bayesian               | $Y=1.03*X+0.243$ ; $r^2=0.972$ | -0.165 | 0.300  |

63 For the median parameter vector, the penetration into ELF, calculated as the  
64 ratio of the  $AUC_{ELF}/AUC_{Plasma}$  for the mice was 0.901 (90.1%).

65 *Non-Human Primate Pharmacokinetic Profile of Linezolid:*

66 The Mean, Median and Standard Deviation of the pharmacokinetic parameter values for  
67 *Cynomolgus macaques* are displayed below in Table S3.

68

69 **Table S3:** Pharmacokinetic parameter values for linezolid administered orally to  
70 *Cynomolgus macaque* as a single dose.

|                    | $V_c$ | CL    | $K_{23}$ | $K_{32}$ | $V_{ELF}$ | $K_a$    | $T_{Lag}$ |
|--------------------|-------|-------|----------|----------|-----------|----------|-----------|
| Units              | L     | L/hr  | $h^{-1}$ | $h^{-1}$ | L         | $h^{-1}$ | hr        |
| Mean               | 5.82  | 1.38  | 3.85     | 13.9     | 0.298     | 0.148    | 0.604     |
| Median             | 5.40  | 1.55  | 2.40     | 14.4     | 0.141     | 0.532    | 0.559     |
| Standard Deviation | 1.48  | 0.592 | 3.62     | 4.84     | 0.242     | 0.251    | 0.652     |

71  $V_c$ =Volume of the Central Compartment; CL=clearance;  $K_{23}$  and  $K_{32}$ = first order  
72 intercompartmental transfer rate constants;  $K_a$ =first order absorption rate constant

73 *Model fit to drug concentration, total bacterial burden and less-susceptible bacterial*  
74 *burden determined simultaneously:*

75 In Table S4 below, the fit of the model to the data is displayed for the cynomolgus  
76 macaques.

77

78 **Table S4:** Fit of the model to the data for the plasma and ELF linezolid profile in  
 79 cynomolgus macaques

| Output | Pre-Bayesian/ Bayesian | Regression                       | MWE    | BAMWSE  |
|--------|------------------------|----------------------------------|--------|---------|
| Plasma | Pre-Bayesian           | $Y=1.19*X-0.483$ ; $r^2=0.588$   | 1.308  | 40.83   |
| ELF    | Pre-Bayesian           | $Y=0.690*X+16.1$ ; $r^2=0.546$   | 1.34   | 44.24   |
| Plasma | Bayesian               | $Y=0.991*X+0.0143$ ; $r^2=0.983$ | -0.286 | 2.23    |
| ELF    | Bayesian               | $Y=0.999*X+0.0143$ ; $r^2=0.999$ | 0.0008 | 0.00002 |

80

81 For the mean parameter vector, the penetration into ELF, calculated as the ratio  
 82 of the  $AUC_{ELF}/AUC_{Plasma}$  for the cynomolgus macaques was 5.41 (541.0 %).

83

84 *Model fit to drug concentrations, total bacterial burden and less-susceptible bacterial*  
 85 *burden simultaneously for murine, NHP and human PK profiles, as simulated in the*  
 86 *HFIM:*

87

88 **Table S5:** Model fit of linezolid concentration-time profiles, total MTB population and  
 89 less-susceptible linezolid MTB population in simulated murine (Panel A), cynomolgus  
 90 macaque (Panel B) and human (Panel C) profiles in the HFIM

91 A. Murine Data

92 Plasma Profile

| Output            | Pre-Bayesian/ Bayesian | Regression                              | MWE    | BAMWSE |
|-------------------|------------------------|-----------------------------------------|--------|--------|
| Concentration     | Pre-Bayesian           | $Y = 0.823 * X + 0.445$ ; $r^2 = 0.994$ | 0.457  | 2.09   |
| Total Col Cts     | Pre-Bayesian           | $Y = 0.755 * X + 1.57$ ; $r^2 = 0.762$  | 0.0941 | 1.35   |
| Resistant Col Cts | Pre-Bayesian           | $Y = 0.651 * X - 0.177$ ; $r^2 = 0.617$ | 6.82   | 15.5   |
| Concentration     | Bayesian               | $Y = 1.02 * X - 0.0574$ ; $r^2 = 0.995$ | -0.127 | 0.110  |

|                   |          |                                     |        |       |
|-------------------|----------|-------------------------------------|--------|-------|
| Total Col Cts     | Bayesian | $Y = 0.846 * X + 1.07; r^2 = 0.622$ | -0.434 | 1.67  |
| Resistant Col Cts | Bayesian | $Y = 1.15 * X - 0.333; r^2 = 0.943$ | 0.0994 | 0.699 |

93

94

95

96 ELF Profile

| Output            | Pre-Bayesian/<br>Bayesian | Regression                           | MWE        | BAMWSE |
|-------------------|---------------------------|--------------------------------------|------------|--------|
| Concentration     | Pre-Bayesian              | $Y = 0.823 * X + 0.445; r^2 = 0.994$ | 0.457      | 2.09   |
| Total Col Cts     | Pre-Bayesian              | $Y = 0.755 * X + 1.57; r^2 = 0.762$  | 0.094<br>1 | 1.35   |
| Resistant Col Cts | Pre-Bayesian              | $Y = 0.651 * X - 0.177; r^2 = 0.617$ | 6.82       | 15.5   |
| Concentration     | Bayesian                  | $Y = 1.01 * X - 0.0336; r^2 = 0.997$ | -0.163     | 0.169  |
| Total Col Cts     | Bayesian                  | $Y = 0.886 * X + 0.806; r^2 = 0.816$ | -0.313     | 0.853  |
| Resistant Col Cts | Bayesian                  | $Y = 1.14 * X - 0.342; r^2 = 0.893$  | 0.178      | 3.35   |

97

98 B. NHP Data

99 Plasma Profile

| Output        | Pre-Bayesian/<br>Bayesian | Regression                            | MWE     | BAMWSE |
|---------------|---------------------------|---------------------------------------|---------|--------|
| Concentration | Pre-Bayesian              | $Y = 0.974 * X + 0.0561; r^2 = 0.992$ | -0.0417 | 0.245  |

|                   |              |                                       |         |       |
|-------------------|--------------|---------------------------------------|---------|-------|
| Total Col Cts     | Pre-Bayesian | $Y = 0.274 * X + 4.44; r^2 = 0.360$   | -2.16   | 47.6  |
| Resistant Col Cts | Pre-Bayesian | $Y = 0.975 * X - 0.0193; r^2 = 0.720$ | 0.170   | 5.02  |
| Concentration     | Bayesian     | $Y = 1.01 * X - 0.0148; r^2 = 0.992$  | -0.0591 | 0.238 |
| Total Col Cts     | Bayesian     | $Y = 1.01 * X - 0.00698; r^2 = 0.886$ | -0.214  | 1.71  |
| Resistant Col Cts | Bayesian     | $Y = 1.11 * X - 0.321; r^2 = 0.985$   | 0.124   | 0.438 |

100 ELF Profile

| Output            | Pre-Bayesian/<br>Bayesian | Regression                          | MWE     | BAMWSE |
|-------------------|---------------------------|-------------------------------------|---------|--------|
| Concentration     | Pre-Bayesian              | $Y = 1.08 * X - 0.884; r^2 = 0.991$ | -0.0770 | 0.580  |
| Total Col Cts     | Pre-Bayesian              | $Y = 1.09 * X - 0.467; r^2 = 0.990$ | 0.201   | 0.484  |
| Resistant Col Cts | Pre-Bayesian              | No Resistant Counts                 |         |        |
| Concentration     | Bayesian                  | $Y = 1.06 * X - 0.705; r^2 = 0.996$ | -0.0605 | 0.0903 |
| Total Col Cts     | Bayesian                  | $Y = 1.04 * X - 0.106; r^2 = 0.948$ | -0.489  | 1.48   |
| Resistant Col Cts | Bayesian                  | No Resistant Counts                 |         |        |

101 C. Human Data  
102 Plasma Profile

| Output            | Pre-Bayesian/<br>Bayesian | Regression                           | MWE    | BAMWSE |
|-------------------|---------------------------|--------------------------------------|--------|--------|
| Concentration     | Pre-Bayesian              | $Y = 1.02 * X + 0.237; r^2 = 0.841$  | -0.232 | 0.836  |
| Total Col Cts     | Pre-Bayesian              | $Y = 0.424 * X + 3.43; r^2 = 0.386$  | -0.139 | 12.1   |
| Resistant Col Cts | Pre-Bayesian              | $Y = 1.21 * X - 0.739; r^2 = 0.745$  | 0.336  | 2.78   |
| Concentration     | Bayesian                  | $Y = 1.03 * X + 0.219; r^2 = 0.847$  | -0.221 | 0.801  |
| Total Col Cts     | Bayesian                  | $Y = 1.01 * X - 0.0304; r^2 = 0.879$ | -0.204 | 1.10   |
| Resistant Col Cts | Bayesian                  | $Y = 1.19 * X - 0.583; r^2 = 0.930$  | 0.110  | 0.941  |

103 ELF Profile

| Output            | Pre-Bayesian/<br>Bayesian | Regression                           | MWE     | BAMWSE |
|-------------------|---------------------------|--------------------------------------|---------|--------|
| Concentration     | Pre-Bayesian              | $Y = 0.958 * X + 0.257; r^2 = 0.942$ | -0.0858 | 0.626  |
| Total Col Cts     | Pre-Bayesian              | $Y = 0.748 * X + 1.10; r^2 = 0.388$  | 1.85    | 9.01   |
| Resistant Col Cts | Pre-Bayesian              | $Y = 1.51 * X - 1.12; r^2 = 0.780$   | 0.329   | 2.09   |
| Concentration     | Bayesian                  | $Y = 0.980 * X + 0.194; r^2 = 0.955$ | -0.0884 | 0.402  |
| Total Col Cts     | Bayesian                  | $Y = 1.01 * X + 0.0203; r^2 = 0.913$ | -0.190  | 1.19   |
| Resistant Col Cts | Bayesian                  | $Y = 1.49 * X - 0.984; r^2 = 0.844$  | 0.144   | 1.67   |

104

105

**Table S6:** Calculated AUC<sub>24h</sub> (mg\*h/L), Cmin (mg/L), and day 28 (hour 672) Mtb killing for HFIM arms in which mouse, NHP, and human PK profiles for linezolid 600 and 900 mg/day were simulated for plasma and ELF.

| Species | Linezolid Dose (mg/d) | Site   | AUC (mg*h/L) | Cmin (mg/L) | Log Mtb killing at 672h |
|---------|-----------------------|--------|--------------|-------------|-------------------------|
| Mouse   | 600                   | plasma | 50.8         | 0.023       | growth                  |
|         |                       | ELF    | 44.05        | 0.017       | growth                  |
|         | 900                   | plasma | 73.8         | 0.026       | 0.115                   |
|         |                       | ELF    | 66.57        | 0.26        | 0.110                   |
| NHP     | 600                   | plasma | 42.6         | 0.185       | 0.843                   |
|         |                       | ELF    | 244.0        | 1.230       | 2.09                    |
|         | 900                   | plasma | 63.4         | 0.342       | 1.66                    |
|         |                       | ELF    | 412.8        | 2.750       | 3.06                    |
| Human   | 600                   | plasma | 57.1         | 0.181       | 0.973                   |
|         |                       | ELF    | 57.7         | 0.212       | 1.048                   |
|         | 900                   | plasma | 81.8         | 0.179       | 1.78                    |
|         |                       | ELF    | 79.6         | 0.113       | 2.44                    |

106

107 *Desired versus achieved Area Under the concentration-time Curve (AUC) for the*  
 108 *prospective validation experiment for resistance suppression:*

109 **Table S7:** Desired versus achieved linezolid Area Under the concentration-time Curve  
 110 (AUC mg\*hr/L) for the prospective validation experiment

| Arm | Desired AUC | Achieved AUC |
|-----|-------------|--------------|
| B   | 250         | 227          |
| C   | 80          | 86.1         |
| D   | 120         | 119          |
| E   | 160         | 173          |
| F   | 250         | 237          |
| G   | 120         | 117          |
| H   | 250         | 244          |



119   References:

- 120       1. Drusano GL, TP Lodise, D Melnick, W Liu, A Oliver, A. Mena, B. Van Scoy, A  
121       Louie. Meropenem penetration into epithelial lining fluid in mice and men and  
122       delineation of exposure targets. *Antimicrob Agents Chemother.* 2011; 55:3406-  
123       3412.
